# Supplementary material
Source: publisher site journal article supplement (https://www.dovepress.com/get_supplementary_file.php?f=297228.docx)

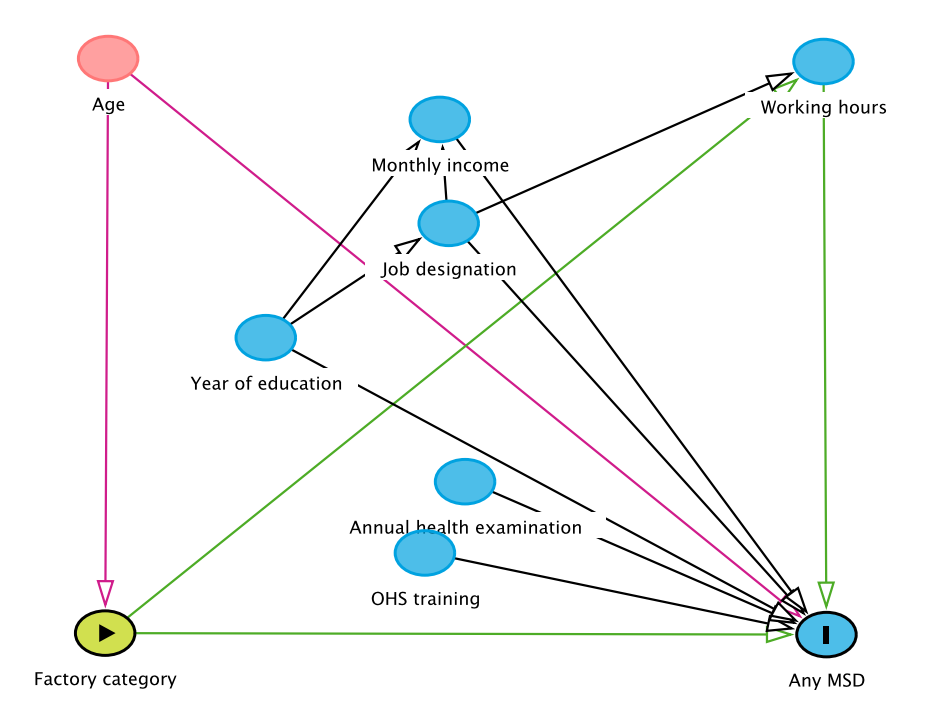


**Supplementary Figure 1** Directed Acyclic Graph (DAG) to adjust confounders.

Supplement: Supplementary file 1 [file get_supplementary_file.php]
